# Supplementary material for: Baseline time accounting: Considering global land use dynamics when estimating the climate impact of indirect land use change caused by biofuels
Source: Springer Nature journal article supplement (doi:10.1007/s11367-012-0488-6), 2012-09-10
Supplement: MOESM1 [file 11367_2012_488_MOESM1_ESM.doc]

Electronic supporting material (Online Resource 1) for

Baseline time accounting: Considering global land use dynamics when estimating the climate impact of indirect land use change caused by biofuels

Jesper Hedal Kløverpris1* and Steffen Mueller2

1 Novozymes A/S, Bagsværd, Denmark, 2 University of Illinois, Chicago, USA

*To whom correspondence should be addressed. E-mail: [jklp@novozymes.com](mailto:jklp@novozymes.com)

The present document provides additional information for the time accounting method presented in the research paper with the above title.

1 Current land use baseline trends

This section contains a more detailed discussion of current land use baseline trends.

1.1 Europe

From 1998 to 2007 (the latest 10 year period for which global land use data were available in the FAOSTAT database (FAOSTAT 2010) at the time of writing), a steady decrease in the European cropland area (arable land and permanent crops) from 308 to 293 million ha (Mha) has been observed (FAOSTAT 2010). During the same period, Europe saw an increase in forest area (FAO 2010b) and an increase in idle cropland (Roques et al. 2011).

1.2 North America

Canadian croplands have been relatively steady at 51-52 Mha since 1980 (FAOSTAT 2010). US cropland area peaked around 1980 at 191 Mha and has since fallen to 173 Mha in 2007 (FAOSTAT 2010). The total cropland area in North America fell by 6 Mha from 1998 to 2007 (FAOSTAT 2010) while idle cropland increased by roughly the same amount (Roques et al. 2011). Furthermore, Smith et al. (2010) reports an increase in the North American forest area from 1990 to 2007.

1.3 Oceania

In Oceania where Australia counts for 95% of the cropland (FAOSTAT 2010), the cropland area was relatively steady (48-51 Mha) from 1980 to the mid-1990s where it dropped drastically by roughly 20% (FAOSTAT 2010). From 1998 to 2007, cropland in Oceania has fluctuated between 47 and 52 Mha without any clear trend[[1]](#footnote-2). As for North America, cropland fluctuations appear to be inversely correlated with idle cropland (based on Roques et al. 2011).

1.4 Developing world

Africa and South/Central America have seen a steady increase in cropland of 23 and 7 Mha, respectively, from 1998 to 2007 (FAOSTAT 2010). Asia has seen some fluctuations in cropland area within this period but an overall increase of 20 Mha, mainly caused by China and, to some extent, Indonesia and Vietnam. However, historical cropland data for China are known to be somewhat uncertain (see e.g. Bruinsma 2003) so the trends for Asia should be interpreted with care.

Fig. 1 shows results for the developed world (Europe, North America, and Oceania) and the developing world (Africa, Asia, and Latin America).

**Fig. 1** Cropland area in recent years (FAOSTAT 2010)

2 Further discussion of the Global Warming Potential

The GWP100 expresses the CO2 emission equivalent to the cumulative radiative forcing (CRF) of another radiative effect seen over a 100 year period. For example, the GWP100 of a 1 kg methane emission is 25 kg CO2 equivalents (CO2e) (Forster et al. 2007). This means that 1 kg of methane released into the atmosphere will cause the same CRF as an emission of 25 kg CO2 within a 100 year period.

Instead of asking what the equivalent CO2 emission is when emitting methane, we are asking what the equivalence in terms of CO2 emissions is to changes in land use compared to the baseline. In other words, how much will the change in CRF be within the next 100 years if land reversion is delayed or expansion of agricultural land is accelerated? At a first glance, it may seem peculiar that CRFBaseline in Fig. 3 in the main paper is truncated after 99 years and not after 100. However, this is completely in line with the question we are asking: Which CO2 emission today would give the same change in CRF within the next 100 years as a change in global land use compared to the baseline? The method proposed is thereby consistent with the GWP concept.

3 Emission profiles for ILUC exceeding the annual change in the baseline

This section explains the reasoning behind the emission profiles for ILUC changes that are larger than the annual changes in the baseline.

3.1 Accelerated expansion happening more than one year in advance of baseline expansion

If ILUC in the form of accelerated expansion (Ia) exceeds the annual baseline expansion (E) in the relevant region, the emissions from the area of land indirectly affected (a) will still occur in the baseline but over a period of more than one year. To account for this, the algorithms in Table 2 in the main paper distribute the baseline emissions over the appropriate amount of time. We illustrate this here by use of the symbols in Table 2 and a situation in which ILUC in the form of accelerated expansion is more than two times higher than the annual baseline expansion but less than three times higher (2E > Ia > 3E). In the ILUC scenario, all above and below-ground emissions are assumed to occur at once whereas they are distributed over three years in the baseline scenario. Following the algorithms in Table 2 (main paper), the baseline emissions are distributed as follows:

Baseline emissions

Year 1: 0

Year 2: E/Ia · a

Year 3: E/Ia · a

Year 4: (Ia-2E)/Ia · a

Sum of baseline emissions: 0 + E/Ia · a + E/Ia · a + (Ia-2E)/Ia · a = (E + E + (Ia-2E)/ Ia · a = Ia/Ia · a = a

As can be seen from the calculation above, the total baseline emissions are equal to the ILUC emissions as they should be, except that they have a different temporal distribution.

3.2 ILUC in the developed world exceeding annual baseline reversion

If the net change in land use exceeds the annual reversion (in a region with a decreasing agricultural area), one year of baseline land reversion will be prevented and the land use change exceeding annual reversion will consist of expansion (into an area that recently ‘reverted’). This can be included in the calculations by considering how much carbon that has been sequestered in the relevant area. However, this is only relevant for the first year of biofuels production. In the next year, the expansion (compared to the baseline) will be into an area that was converted due to the previous year’s biofuels production, i.e. the second year of biofuels production prevents the land that was ‘re-converted’ in the previous year from reverting. This means that from the second year of biofuels production, the ILUC impact corresponds to one year of carbon sequestration on the area indirectly affected by biofuels production in the developed world. Thus, the emissions profiles in Table 1 in the main paper are valid for all but the first year of production.

We will give some further consideration to the first year of biofuels production by considering an example in which ILUC (in the developed world) is 3.3 times higher than in the annual baseline reversion (R). In this situation, ILUC would prevent carbon sequestration on an area corresponding to the net change in land use. We use the symbol Id to represent that area (ILUC in terms of delayed reversion). Furthermore, ILUC would cause conversion of an area equal to R that has sequestered carbon for one year. Beyond that, it would cause conversion of an area equal to R that has sequestered carbon for two years and, finally, it would cause conversion of an area of Id–3R that has sequestered carbon for 3 years. If C is the annual carbon sequestration per ha, the carbon fluxes in the baseline and the ILUC scenario can be illustrated as in Fig. 2.

Baseline

ILUC

R·C

R·2C

Id (ILUC)

(Id-3R)·3C

(-R·C) + (-R·C) + (-R·C) + (-(Id-3R)C) = -Id·C

**Fig. 2** Carbon fluxes in the first year of biofuels production in an area where agricultural land use is declining. In this example, ILUC (given in ha) is 3.3 times higher than the annual reversion in the baseline. C symbolizes annual carbon sequestration per hectare.

To calculate the change in land use emissions, we subtract the baseline from the ILUC scenario using the symbols in Fig. 2:

R·C + R·2C + (Id-3R)·3C – (-Id·C) = 3RC + 3Id·C -9RC + Id·C = 4Id·C – 6RC

Since Id equals 3.3R, the change in emissions can also be described as follows:

4Id · C – 6 RC = 4 · 3.3 RC – 6 RC = 7.2 RC

More generally, the change in carbon flux in the first year of production can be described as follows.

If n is the full number of “parcels” R contained in Id, (Id/R rounded down), the ILUC emissions (in a region with decreasing cropland) caused by the first year of biofuels production can be expressed as follows:

RC + 2RC + … + nRC + (Id-nR) · (n+1)C

Using the example from above (where Id = 3.3R and n is thereby 3) would give:

RC + 2RC + 3RC + (Id-3R) · 4C = 6RC + (3.3R – 3R) · 4C = 6RC + 0.3R · 4C = 7.2 RC

As shown, the general formula gives the same result as obtained with the example above.

Finally, we show how the emissions profiles can be modeled by splitting the total change into the baseline sequestration and ILUC emissions (see Fig. 2).

Baseline emissions, year 1: -Id · C / Ebiofuel

ILUC emissions, year 1: (RC + 2RC + … + (Id-nR) · nC) / Ebiofuel

- where Ebiofuel is the annual biofuels energy capacity (measured in MJ).

4 Baseline time accounting applied to existing studies

This section contains a detailed explanation of how the baseline time accounting concept was applied to existing ILUC studies.

4.1 Baseline time accounting applied to ILUC study by Searchinger et al. (2008)

Searchinger et al*.* (2008) used the economic CARD/FAPRI modeling framework and carbon emission data from Wood’s Hole to model the land use changes and consequent GHG emissions caused by an increased US corn ethanol production of 56 billion liters per year (bly). A net increase in cultivated land of 10.8 Mha was estimated. In nine of the 11 world regions studied (incl. the USA), ILUC was assumed to take place as simple expansion with 25% loss of below-ground carbon and 100% loss of above-ground carbon. For Europe and the Former Soviet Union (FSU), the ILUC emissions were calculated as the carbon sequestration prevented by 30 years of biofuels production (subsequently divided by 30 years of biofuels production in the annualization step). It was thereby acknowledged by Searchinger et al*.* (2008) that croplands are declining in these regions.

Estimated area change and emissions data from the original study are given in Table 1[[2]](#footnote-3). Searchinger et al*.* (2008) arrive at their ILUC factor estimate (104 g CO2e/MJ) by dividing the total emissions (2.86 Gt CO2e for the developing world and 0.937 Gt CO2e for the developed world, see Table 1) with 30 years of ethanol production (55.9 billion liters per year or 1.22 billion GJ per year)[[3]](#footnote-4).

**Table 1: Area and emissions data from Searchinger et al*.* (2008**)

|  | Area change | Land use em. | Total em. | Veg. C + 25% | 30 y uptake existing |
| --- | --- | --- | --- | --- | --- |
|  | (1000 ha) | (t CO2e/ha) | (Mt CO2e) | soil C (t C/ha) | forest (t C/ha) |
| Africa | 1,141 | 288 | 329 | 77.1 | 1.49 |
| Latin Am. | 3,359 | 337 | 1,132 | 89.0 | 2.86 |
| N. Africa and M. East | 382 | 94 | 36 | 25.7 | 0.00 |
| China/India/Pakistan | 2,433 | 199 | 484 | 54.3 | 0.00 |
| SE Asia | 796 | 1,019 | 811 | 248.1 | 29.41 |
| RoW | 208 | 351 | 73 | 85.2a | 10.5a |
| Total, developing | 8,319 | 2,289 | 2,865 | - | - |
| Canada | 39 | 311 | 12 | 81.8 | 2.94 |
| Europeb | 264 | 262 | 69 | 31.1 | 40.37 |
| Former Soviet Unionb | -153 | 197 | -30 | 32.7 | 20.94 |
| Developed Pacific | 104 | 232 | 24 | 62.9 | 0.04 |
| USA | 2,245 | 384 | 861 | 99.4 | 5.13 |
| Total, developed | 2,499 | 1,386 | 936 | - | - |
| a Estimated by the authors of the present study as no data were available in the original study  b No carbon from vegetation (Veg. C) due to declining cropland area | | | | | |

4.1.1 Accelerated expansion in the developing world

In order to apply the baseline time accounting concept, it is necessary to derive above- and below-ground carbon emissions in the developing world based on the background data from the study by Searchinger et al*.* (2008).

The column in Table 1 with carbon in vegetation and soil (Veg. C + 25% soil C) represents GHG emissions from above- and below-ground biomass. In Table 2, we convert these emissions into above- and below-ground GHG emissions per ethanol capacity increment (56 bly or 1.2 billion GJ per year). We do so by use of the ‘area change’ given in Table 1 and the conversion factor 3.67 g CO2e / g C. A calculation example for Africa is given below:

Above- and below-ground GHG emissions for Africa =
77.1 t C/ha · 3.67 · 106 g CO2e/t C · 1,141 · 103 ha / (1.22 · 1012 MJ) = 265 g CO2e/MJ

**Table 2: GHG emissions from above- and below-ground carbon (given per energy capacity) derived from Searchinger et al*.* (2008**)

|  | Above- and below-ground C |
| --- | --- |
|  | (g CO2e/MJ cap.) |
| Africa | 265 |
| Latin Am. | 900 |
| N. Africa and M. East | 30 |
| China/India/Pakistan | 398 |
| SE Asia | 595 |
| RoW | 53 |
| Total, developing | 2240 |

As shown in Table 2, Searchinger et al*.* (2008) estimate a one-time ILUC emission in the developing world from above- and below-ground carbon of 2240 g CO2e per MJ installed ethanol production capacity. Following the logic behind baseline time accounting, these are the emissions taking place earlier than they would have in the baseline (accelerated expansion).

Since the ILUC in the developing world estimated by Searchinger et al*.* (2008) (see Table 1) exceeds the current annual baseline expansion in the developing world (4.9 Mha, see main paper Section 2), we use the algorithms in Table 2 in the main paper to construct the emission profiles for the developing world to be used in the climate model (see main paper Section 2.3). Since ILUC (Ia) is larger than the annual baseline expansion (E) but not more than twice as high, emissions in the baseline will look like this:

Baseline, year 1: 0 g CO2e/MJ

Baseline, year 2: 4.9 Mha / 8.3 Mha · 2240 g CO2e/MJ = 1320 g CO2e/MJ

Baseline, year 3: (8.3Mha - 4.9 Mha) / 8.3 Mha · 2240 g CO2e/MJ = 920 g CO2e/MJ

Total: 2240 g CO2e/MJ

The ILUC emissions profile will have an emission of 2240 g CO2e/MJ in year 1.

4.1.2 Delayed reversion in the developed world

In order to apply the baseline time accounting concept, data on carbon sequestration is required for the regions in the developing world where delayed reversion is the expected (indirect) outcome of biofuels production. In principle, these data could be derived from the column called ’30 y uptake existing forest’ in Table 1. However, Searchinger et al*.* (2008) modeled foregone carbon sequestration in mature ecosystems (converted and prevented from carbon sequestration). When applying baseline time accounting, we need data on the average carbon sequestration rate on abandoned agricultural land over the GWP accounting period (100 years). This presents some challenges as the sequestration rate follows a sigmoidal (S-shaped) curve (Lal 2010; Gorte 2007). This means that the sequestration starts off slow, then speeds up, and finally slows down again when the ecosystem approaches maturity (see Fig. 3).

Legend

Baseline carbon sequestration

Delayed carbon sequestration

**Carbon sequestration (t C/ha)**

**Time (y)**

**Fig. 3** Conceptual illustration (not to scale) of carbon sequestration seen over time. The curves illustrate the actual development whereas the straight lines illustrate the average

Another challenge is the large variation in carbon sequestration estimates. Watson et al*.* (2000) reports potential carbon sequestration rates from afforestation/reforestation of 1.5 to 4.5 Mg C/ha (5.5-17 t CO2e/ha) in temperate regions (assumed to be relevant for most of the developed world). This does not include soil carbon and dead organic matter. McLauchlan (2006) cites five studies on soil organic carbon (SOC) accumulation in former US agricultural fields reverting to forests. Values range from 1.5-5.8 g C/m2 per year (0.055-0.21 t CO2e/ha/y). Furthermore, Righelato and Spracklen (2007) applied carbon sequestration data of 1.0 Mg C/ha/y (3.7 t CO2e/ha) for conversion of cropland to grassland. This data applies to a period of 30 years and the average number for 100 years will be different depending on the shape of the sigmoid curve (see above).

To tackle the challenges of the S-shaped curve and the large variation in carbon sequestration data, we make the following simplifying assumption:

*We assume that land reverting from cultivation to a natural ecosystem will reach maturity within*

*100 years and thereby re-sequester the carbon that was originally lost upon conversion to cropland.*

This assumption allows us to derive an average carbon sequestration rate based on Table 1. The second last column shows the region-specific GHG emissions from above- and below-ground carbon occurring when land is converted to cropland. By dividing these numbers with 100 years, we obtain the average carbon sequestration rate over this period of time. If the ecosystem does not reach majority within this period of time, the carbon sequestration rate will be slightly overestimated (most of the carbon built-up will take place during the first century). If the ecosystem reaches majority sooner than in 100 years and stops sequestering carbon, the described method will still give the correct average for the full period. On the other hand, if the ecosystem reaches majority sooner than in 100 years and keeps sequestering carbon, the method will give a slightly underestimated result (the early sequestration will be most significant). Finally, if ‘retired cropland’ goes fallow and is plowed every few years to prevent it from turning into wild nature, the method described will greatly overstate the carbon sequestration (even more if ‘retired cropland’ is developed).

With the approach described above and the data in Table 1, we derive an average carbon sequestration rate for Canada, Developed Pacific, and the USA of 3.0, 2.3, and 3.6 t CO2e/ha, respectively. Since the data for Europe and the Former Soviet Union in Table 1 does not include above-ground carbon, we use the average of the carbon sequestration rates estimated for the three other regions in the developing world, i.e. 3.0 t CO2e/ha [(3.0 + 2.3 + 3.6) t CO2e/ha / 3 = 3.0 t CO2e/ha]. The weighted average based on the area change in Table 1 for the five regions in the developing world is 2.9 t CO2e/ha per year.

The net land use change (ILUC) in the developed world modeled by Searchinger et al*.* (2008) is 2.5 Mha (see Table 1). Following the logic of the baseline time accounting concept, every year of biofuels production will delay reversion of this area. We do not know exactly which ecosystem type that land will revert to (or if some of it will be converted to parking lots or highways, which would not sequester carbon at all). We therefore apply a crude approach in which we use the weighted average of carbon sequestration rates calculated above to arrive at an estimate of delayed reversion:

2.5 · 106 ha · 2.9 · 106 g CO2e/ha / (1.22 · 1012 MJ) = 5.9 g CO2e/MJ

This is the number we use in the emissions profile for delayed reversion in the developed world.

As discussed in Section 3.2, the first year of biofuels production constitutes a special case if the ILUC in a region with declining croplands exceeds the annual reversion. The ILUC in the developed world estimated by Searchinger (2.5 Mha) is higher than the estimated annual reversion of 2.2 Mha but not more than twice as high. This means that the ILUC beyond the 2.2 Mha will actually be expansion into an area that has sequestered carbon for one year. Following the algorithms laid out in Section 3.2, the emissions profile in this special case will look like this:

Baseline emissions, year 1: -Id · C / Ebiofuel = -5.9 g CO2e/MJ (see above)

ILUC emissions, year 1: (Id-nR) · nC) / Ebiofuel

= (2.5-2.2) · 106 ha · 2.9 · 106 g CO2e/ha / (1.22 · 1012 MJ)

= 1.1 g CO2e/MJ

4.1.3 ILUC factor derived with the baseline time accounting concept

Based on Sections 5.1.1 and 5.1.2, we construct the emissions profiles shown in Table 3a.

**Table 3a: Land use emissions (g CO2e/MJ) from the ILUC study by Searchinger et al*.* (2008**) as modeled with the baseline time accounting concept

| Region | Year → | 1 | 2 | 3 | … |
| --- | --- | --- | --- | --- | --- |
| Developing | ILUC | 2240 | - | - | - |
| Baseline | - | 1322 | 918 | - |
| Developed | ILUC | - | - | - | - |
| Baseline | -5.9 | - | - | - |

By use of the climate model and the data in Table 3a, we derive an ILUC factor of 30 g CO2e/MJ of which 24 g CO2e/MJ stem from accelerated expansion in the developing world and 6 g CO2e/MJ stem from delayed reversion in the developed world (see Online Resource 2). This is 71% lower than the original estimate by Searchinger et al*.* (2008) of 104 g CO2e/MJ. For the special case of the first year of production, the ILUC factor is 31 g CO2e/MJ.

4.1.4 Sensitivity analyses

In the above analysis, we assumed that carbon lost upon conversion to cropland will be re-sequestered during 100 years when cropland reverts. In this section we investigate the sensitivity to assumptions regarding the sequestration profile.

We begin by assuming that carbon lost upon conversion to cropland will be re-sequestered during 20 years. The annual sequestration would then be 50.3 g CO2e/MJ [10.1 g CO2e/MJ · 100 y / 20 y]. We thus construct a baseline emissions profile with this annual sequestration (negative emission) in year 1 to 20. Likewise, we construct a delayed reversion profile for the ILUC scenario where the same sequestration occurs one year later, i.e. from year 2 to 21. This causes the contribution from the ILUC factor from delayed reversion to go down from 5.9 to 4.6 g CO2e/MJ (~20%). This could have to do with the fact that sequestration now occurs in the same number of years in both the baseline and the ILUC scenario whereas it occurs for respectively 100 and 99 years in the main results from Section 4.1.3.

To investigate this aspect further; we consider recovery of above- and below-ground carbon during 99 years instead of 20. This gives us a yearly sequestration of 6.0 g CO2e/MJ [10.1 g CO2e/MJ · 100 y / 99 y] and the same number of sequestration years in both the baseline and the ILUC scenario. The resulting contribution to the ILUC factor is 5.85 g CO2e/MJ compared to 5.94 g CO2e/MJ in the main results (see Section 4.1.3), i.e. almost no change.

Finally, we consider an unrealistic situation in which all carbon is recovered in one year (year 1 in the baseline, year 2 in the ILUC scenario). This is analogous to accelerated expansion and the contribution to the ILUC factor is 4.51 g CO2e/MJ (slightly lower than the 20 year case).

The results above show that the longer it takes for the carbon to be re-sequestered, the higher is the ILUC factor. It is also shown that results (for delayed reversion) can vary by roughly 20% depending on assumptions regarding the carbon sequestration profiles.

4.1.5 Adjusted annual baseline expansion

As mentioned in Section 4.2 of the main paper, US corn ethanol production may potentially have had an influence on the annual baseline expansion as estimated in the present study. Searchinger et al. (2008) actually looked at potential ILUC from a possible *future* increase in corn ethanol production of 56 million liters (above projected levels for 2016). In size, this corresponds roughly to the current mandated US corn ethanol production of 57 million liters and, for the purpose of this exercise, we will modify the land use baseline based on the hypothesized ILUC estimated by Searchinger et al. (2008). We do so by adjusting the estimated baseline expansion in the developing world (E in Table 2 of the main paper). For the developed world, an adjustment would only be relevant for the special case of the first year of production (see Section 3.2) and this aspect has been disregarded here. We modify baseline expansion in the developed world (E = 4.9 Mha/y) by subtracting the ILUC in the developing world estimated by Searchinger et al. (8.3 Mha, see Table 1) multiplied by the fraction of increased corn ethanol production realized from 1998 to 2003 (19.3/56 = 34%). We thereby get an adjusted baseline expansion in the developed world (Ea) of 2.03 Mha/y [4.9 Mha/y – 8.3 Mha · 34%]. When using the adjusted baseline expansion and inserting resulting emission profiles in the climate model (see Table 2 in the main paper), the ILUC factor increases from 30 to 50 g CO2e/MJ. Emission profiles are shown in Table 3b.

**Table 3b: Land use emissions (g CO2e/MJ) from the ILUC study by Searchinger et al*.* (2008) as modeled with the baseline time accounting concept – with adjusted annual baseline expansion in the developing world**

| Region | Year → | 1 | 2 | 3 | 4 | 5 | 6 | … |
| --- | --- | --- | --- | --- | --- | --- | --- | --- |
| Developing | ILUC | 2240 | - | - | - | - | - | - |
| Baseline | - | 548 | 548 | 548 | 548 | 48 | - |
| Developed | ILUC | - | - | - | - | - | - | - |
| Baseline | -5.9 | - | - | - | - | - | - |

4.2 Baseline time accounting applied to ILUC study by Hertel et al. (2010)

Hertel et al*.* (2010) used a modified version of the standard GTAP Model to estimate the land use changes caused by an increase in corn ethanol production of 50.15 bly (1.09 billion GJ/y).

The applied version of the GTAP model has a fixed amount of managed land available for cropland, pasture, and forestry, which means that a shock to the model (e.g. a change in ethanol demand) will not change the total area of land under “human control” but only result in a re-distribution of existing managed land between agricultural and forestry sectors[[4]](#footnote-5). The GTAP Model is also a static model[[5]](#footnote-6), which means that it moves instantaneously from one economic equilibrium to another when shocked. In that sense, the model is not completely consistent with the reality of a dynamic baseline and thereby with the baseline time accounting concept. We consider that a limitation of the model, not a weakness of the baseline time accounting concept. In order to apply baseline time accounting to the study by Hertel et al*.* (2010), their ILUC estimates must be interpreted as land use changes that would have happened anyway as a result of other drivers. However, the land use changes estimated by Hertel et al*.* (2010) shows not only cropland expansion and reduction in forests and pasture but also forest reversion, especially in Europe (see Table 4). The reason for the forest reversion is that cropland expansion into forests in one region may cause another region to grow more forest to partially compensate for the reduced supply of forest products. With a fixed amount of managed land in the model, the increase in forests has to come from agricultural land use. However, the theory behind the baseline time accounting concept is that ILUC from biofuels is delaying forest reversion (in the developed world), not causing it. We discuss this aspect below and show how data could potentially be modified to address the issue. For our final analysis in the main paper, we have however used the unadjusted numbers for simplicity (and because it does not make a big difference).

**Table 4: ILUC estimates in 1000 ha (Hertel et al. 2010**)

|  | Forest cleared | Forest reversion | Pasture cleared | New cropland |
| --- | --- | --- | --- | --- |
| Africa | -50 | 40 | -633 | 644 |
| Latin America | -72 | 91 | -513 | 495 |
| Asia* | -42 | 113 | -270 | 198 |
| Developing, total | -164 | 244 | -1,416 | 1,337 |
| Canada | -269 | 0 | -139 | 408 |
| Europe | -289 | 252 | -595 | 632 |
| United States | -567 | 73 | -965 | 1,458 |
| Developed, total | -1,124 | 325 | -1,699 | 2,498 |
| Total, global | -1,289 | 569 | -3,115 | 3,835 |
| *Incl. Oceania | | | | |

The GHG emissions corresponding to the ILUC estimates in Table 4 are shown in Table 5 (same numbers as in Figure 1 in the original paper).

**Table 5: GHG emissions from indirect land use change given in million tons CO2e (Hertel et al. 2010**)

|  |  | Forest cleared | Forest reversion | Pasture cleared | Crop biomass |
| --- | --- | --- | --- | --- | --- |
| Africa |  | 15 | -5 | 30 | -12 |
| Latin America | | 28 | -15 | 37 | -9 |
| Asia* |  | 26 | -47 | 63 | -4 |
| Total, developing | | 70 | -67 | 129 | -25 |
| Canada |  | 189 | 0 | 27 | -7 |
| Europe |  | 86 | -99 | 93 | -12 |
| United States | | 430 | -16 | 103 | -27 |
| Total, developed | | 706 | -115 | 223 | -46 |
| Total, global | | 775 | -182 | 352 | -71 |
| *Incl. Oceania | | | | | |

In order to apply the baseline time accounting concept to the study by Hertel et al*.* (2010), more disaggregated data than that given in Table 4 and 5 is required. We have therefore obtained background data from the study. Appendix A gives a more detailed overview of the land use changes modeled by Hertel et al*.* (2010) and Appendix B shows the emissions data applied.

4.2.1 Accelerated expansion in the developing world

We start by deriving the ILUC emissions taking place as accelerated expansion in the developing world. As previously discussed, Hertel et al*.* (2010) include forest reversion in their ILUC factor estimation. We will begin by accepting the emissions data “as is” and then try to modify them to see how this could affect results.

The total cropland expansion in the developing world (Africa, Asia, and Latin America) modeled by Hertel et al*.* (2010) amounts to 1.2 Mha[[6]](#footnote-7) (see Appendix A). The total emissions from this area estimated by Hertel et al*.* (2010) include foregone sequestration, which must be sorted out in order to apply the baseline time accounting concept (see main paper, Section 2). We therefore calculate the emissions solely from conversion of above- and below-ground carbon based on the data in Appendix A and B. Here is a calculation example for Brazil:

ILUC emissions from above- and below-ground carbon =

279,000 ha · (-18) t CO2e/ha – 59,000 ha · (-299 – 75) t CO2e/ha) – 220,000 ha · (-33 – 39) t CO2e/ha + 0 · (0 – 66) t CO2e/ha ≈ 33 million t CO2e

Results for the remaining regions can be found in Table 6 in the column called ‘Emissions without adjustments’.

When adding up the ILUC emissions from above- and below-ground carbon for the entire developing world, we get 120 million t CO2e or 110 g CO2e/MJ (when dividing with the ethanol capacity increment of 1.09 billion GJ/y).

If forest reversion is taken out of the calculation, the numbers change to 139 million t CO2e or 127 g CO2e/MJ, respectively (see Table 6 ‘Emissions without forest reversion’). However, this operation results in inconsistent land use changes because the change in forest and pasture will no longer equal the expansion of cropland (see figures in Table 4). To avoid this inconsistency, we reduce the land use change numbers relative to the change in new cropland and forest reversion. In other words, we multiply the areas of cleared forest and pasture with the following adjustment factor (AF):

As an example, the adjustment factor for Oceania is 102 / (102+1.9) = 98% (see Appendix A). Adjustment factors and adjusted areas of forest and pasture clearing for all regions can be found in Table 6. With these adjustments (and the resulting consistent land use balance), the GHG emissions from above- and below-ground carbon are 110 million t CO2e or 101 g CO2e/MJ. It may seem counter-intuitive that the number decreases (by ~8%) compared to the unadjusted estimate when forest reversion is excluded. The reason is that the increase in below-ground carbon caused by forest reversion (see Appendix B) is generally lower than the release of above- and below-ground carbon caused by conversion of pasture/forest. Therefore the ‘area-adjusted’ total carbon emissions are reduced. As mentioned, we use the unadjusted estimate of GHG emissions from above- and below-ground carbon in the developing world (110 g CO2e/MJ) when calculating the ILUC factor based on the baseline time accounting concept.

**Table 6: Emissions and land use data relating to above- and below-ground carbon (derived from Hertel et al. 2010**)

|  |  | Emissions without | Emissions without forest | Adjustment factors | Land use change, adjusted | | Emissions normalized to |
| --- | --- | --- | --- | --- | --- | --- | --- |
| Region | Subregions | adjustment (Mill. t CO2e) | reversion (Mill. t CO2e) | (AF) | Forest cleared (1000 ha) | Pasture cleared (1000 ha) | new cropland (Mill. t CO2e) |
| Africa | MEASTNAEX | 4.6 | 4.6 | 98% | 0.0 | -70.5 | 4.5 |
|  | SSAEX | 22.2 | 25.4 | 93% | -43.1 | -447.4 | 22.9 |
|  | RoAFR | 2.9 | 2.9 | 100% | -3.7 | -79.0 | 2.9 |
|  | Total | 29.7 | 33.0 | - | -46.8 | -596.9 | 30.4 |
| Latin America | BRAZIL | 32.7 | 32.7 | 100% | -58.9 | -220.0 | 32.7 |
|  | LAEEX | 12.8 | 13.9 | 91% | -12.4 | -149.0 | 12.3 |
|  | RoLAC | 3.3 | 8.2 | 42% | 0.0 | -54.8 | 2.9 |
|  | Total | 48.8 | 54.8 | - | -71.3 | -423.7 | 47.9 |
| Asia | CHIHKG | 15.6 | 22.7 | 28% | 0.0 | -33.9 | 6.0 |
|  | INDIA | 16.2 | 16.2 | 100% | -26.2 | -16.2 | 16.2 |
|  | SASIAEEX | -0.9 | 1.3 | -97% | 0.0 | 12.2 | -0.8 |
|  | RoHIA | 0.0 | 0.0 | 97% | 0.0 | -0.2 | 0.0 |
|  | JAPAN | 3.6 | 3.6 | 100% | -6.8 | -1.4 | 3.6 |
|  | RoASIA | 7.0 | 7.2 | 92% | -6.7 | -16.7 | 6.6 |
|  | Total | 41.5 | 51.0 | - | -39.8 | -56.2 | 31.6 |
| Total, developing |  | 120.1 | 138.7 | - | -157.8 | -1076.9 | 109.9 |

4.2.2 Delayed reversion in the developed world

We now move on to carbon sequestration in the developed world. We use the same overall approach described in Section 4.1.2. However, the data in Appendix A and B allows us to calculate carbon loss from both forest and pasture conversion (to cropland). As we do not know whether cropland going out of production will revert to forest or grassland type ecosystems (with some similarity to pasture) or even be converted to developed areas, we derive an average estimate of carbon sequestration for forest and grassland. We do that in the following way.

We divide the above- and below-ground carbon loss (Appendix B) from conversion of respectively pasture and forest by 100 years. We make a modification of the above-ground carbon in forests because Hertel et al*.* (2010) assumes that 10% of forest biomass is sequestered in timber products or in charcoal. Here is a calculation example for Canada:

Forest: (528 · 1/(1-10%) + 123) t CO2e/ha / 100 y = 7.1 t CO2e/ha/y

Pasture : (23 + 173) t CO2e/ha / 100 y = 2.0 t CO2e/ha/y

Just as in the case of Searchinger et al*.* (2008), no above-ground carbon emissions are counted for Europe (see Appendix B). For this region, we therefore use the average carbon sequestration rate for Canada, USA, and Oceania, which is estimated at 6.3 and 1.3 t CO2e/ha/y for forest and pasture, respectively.

If we use the net change in cropland (New cropland in Appendix A) to derive a weighted carbon sequestration average in the developed world, we get 7.2 and 1.3 t CO2e/ha/y for forest and pasture, respectively.

As mentioned previously, we do not know whether ‘retired cropland’ reverts to forest or grassland type ecosystems (or reverts at all). We therefore use an average of the estimated carbon sequestration rate for forest and pasture, i.e. 4.2 t CO2e/ha/y [(7.2+1.3) t CO2e/ha/y / 2 = 4.2 t CO2e/ha/y]. We thereby consider pasture a proxy for a grassland type ecosystem. We acknowledge the uncertainty of this.

Hertel et al*.* (2010) estimate that the net change in cropland area in the developed world is 2.6 Mha (see Appendix A). We combine this number with the estimate of the annual average carbon sequestration from above. We reiterate that this number is uncertain (see uncertainty analyses in Section 4.2.4). Based on the numbers described above, we estimate the following impact from delayed reversion:

2.6 · 106 ha · 4.2 · 106 g CO2e/ha / (1.09 · 1012 MJ) = 10.1 g CO2e/MJ

Furthermore, we consider the special case of the first year of biofuels production (see Section 3.2 and 4.1.2), which gives the following results:

Baseline emissions, year 1: -Id · C / Ebiofuel = -10.1 g CO2e/MJ (see above)

ILUC emissions, year 1: (Id-nR) · nC) / Ebiofuel

= (2.6-2.2) · 106 ha · 4.2 · 106 g CO2e/ha / (1.09 · 1012 MJ)

= 1.5 g CO2e/MJ

4.2.3 ILUC factor derived with the baseline time accounting concept

Based on Sections 4.2.1 and 4.2.2, we construct the emissions profiles shown in Table 7.

**Table 7: Land use emissions (g CO2e/MJ) from the ILUC study by Hertel et al*.* (2010) as modeled with the baseline time accounting concept**

| Region | Year → | 1 | 2 | 3 | … |
| --- | --- | --- | --- | --- | --- |
| Developing | ILUC | 110 | - | - | - |
| Baseline | - | 110 | - | - |
| Developed | ILUC | - | - | - | - |
| Baseline | -10.1 | - | - | - |

By use of the climate model and the data in Table 7, we derive an ILUC factor of 10.9 g CO2e/MJ of which 0.8 g CO2e/MJ stem from accelerated expansion in the developing world and 10.1 g CO2e/MJ stem from delayed reversion in the developed world (see Online Resource 3). This is 59% lower than the original estimate by Hertel et al*.* (2010) of 26.6 g CO2e/MJ. As shown in Section 4.1.4, there is some sensitivity to assumptions regarding the carbon sequestration profiles for delayed reversion. For the special case of the first year of production, we derive an ILUC factor of 12.4 g CO2e/MJ.

*Crop biomass*

Hertel et al*.* (2010) include the carbon bound in crop biomass in their analysis. They estimate that cropland binds 18 t CO2e/ha. This means that when e.g. forest is converted to cropland there is first a flux of carbon from the original ecosystem into the atmosphere but some of this is then re-absorbed when cropland is developed. When applying the baseline time accounting concept, we have another perspective for the developed world. In this case, cropland that would have gone out of production (and thereby start carbon sequestration) stays cropland. In this sense, there is no change in the carbon bound in the cropland and we have therefore not included it in our analysis.

4.2.4 Sensitivity analyses

Due to the uncertainty related to reversion, we have performed the following sensitivity analyses relating to carbon sequestration.

*Reversion to forest or grassland*

We used an average sequestration rate for forest and grassland (see Section 4.1.2). The results below are based on the assumptions that all land reverts to forest or all land reverts to grassland.

All forest reversion (C seq. = 7.3 t CO2e/ha): ILUC factor = 18.3 g CO2e/MJ

All forest reversion (C seq. = 1.3 t CO2e/ha): ILUC factor = 3.9 g CO2e/MJ

As shown above, the ’all forest reversion’ (worst case) uncertainty analysis gives a result, which is roughly 30% lower than the original ILUC factor estimated by Hertel et al*.* (2010) with the 30 year annualization method (26.6 g CO2e/MJ).

4.2.5 Adjusted annual baseline expansion

As mentioned in Section 4.2 of the main paper, US corn ethanol production may potentially have had an influence on the annual baseline expansion as estimated in the present study. Hertel et al. (2008) looked at enhanced ethanol production from 2001 to 2015 (50 billion liters), which was estimated to result in 1.3 Mha new cropland in the developing world (see Table 4). When adjusting baseline cropland expansion (as done for the Searchinger study in Section 4.1.5), it remains larger than the ILUC estimated by Hertel et al. (2010) and therefore the adjustment has no influence on the ILUC factor estimated by use of the baseline time accounting concept.

**5 Future changes in land use**

To study the future validity of the baseline time accounting concept, a literature review of land use projections was performed. Several studies were considered and seven of them provided quantitative information on the temporal development of global land use from now and several decades into the future. These seven studies are briefly described below.

*Fischer et al.* (2002) projected change in cultivated land for six IPCC scenarios. Two of them are considered irrelevant in this context because they differ significantly from UN’s world population prospects (UN Population Division 2009) predicting a global population of roughly 9.1 billion in 2050. The remaining four scenarios (A1, B1, B2, and B2s) predict a slight decrease in agricultural land use in the developed world (between 2 and 6 Mha) and a significant increase in Africa, Latin America, and Asia (roughly 70 to 110 Mha in total) from 2010 to 2050.

Bruinsma(2003) also predicted significant increases in arable land use in Sub-Saharan Africa and Latin America up to 2030 (this study did not look any further) and more modest changes in Asia, the Near East, and North Africa. Based on (FAO 2003), Bruinsma (2009) projected future changes in cultivated land use caused by food and feed productions (no bioenergy). This projection shows a steady and significant decrease in arable land use in the developed world (43 Mha from 2010 to 2050) and a significant increase in the developing world of roughly 100 Mha (Sub-Saharan Africa and Latin America accounting for most of it).

*Fischer* (2009) made a similar ‘Food and feed only scenario’ confirming Bruinsma’s trends for the developing world but with more modest changes in the developed world. Fischer (2009) also studied five main scenarios with biofuels, some based on the World Energy Outlook 2008 (IEA 2008) and some based on mandatory, voluntary, or indicative targets for biofuels announced by major countries. For the developed world, an increase between 9 and 48 Mha is predicted for the period 2010 to 2030 whereupon arable land use levels out or declines slightly up to 2050. For the developing world, increases between 140 and 390 Mha are observed from 2010 to 2050. Fischer (2009) also studies the impact of climate change on land use projections and finds that the expected changes are reduced when this aspect is considered. However, results are only given at a very aggregate level and not considered further here.

As part of the Millennium Ecosystem Assessment, *Alder et al.* (2005) made projections of agricultural land use for four scenarios (biofuels included in different quantities) of which one is disregarded here due to a significant deviation from UN’s world population prospects (UN Population Division 2009). For the three relevant scenarios, agricultural land use in the developing world increases significantly from 2010 to 2050 (by 360 to 600 Mha) while it decreases slightly in the developed world until 2030 whereupon it increases slightly again.

*Bakkes and Bosch* (2008) produced agricultural land use projections to 2050. Energy projections (incl. biofuels) from IEA (2006) were used. In the applied modeling framework, bioenergy crops were assumed to be produced on abandoned agricultural land and natural grasslands only (by model default). The inclusion of biofuels had little influence on the projected trends in agricultural land use. In West and Central Europe, agricultural land use was projected to decline steadily by more than 10 Mha from 2010 to 2050. In North America, total agricultural land use was projected to increase slightly up to 2015 (by ~10 Mha compared to 2010) and then continue its current and historic decrease up to 2050 (falling ~40 Mha compared to 2015). In Oceania, land use was projected to increase slightly but steadily from 2010 to 2050 by roughly 30 Mha. In Africa, a steady increase for the same period of 260 Mha was projected. For Asia and Latin America, an increase of ~80 and ~40 Mha, respectively, was projected up to 2030 (compared to 2010) followed by a steady level in Asia and a significant decline in Latin America up to 2050. The projected decline in Latin America is atypical compared to other studies.

*Stehfest et al.* (2009) modeled a land use reference scenario based on the same modeling framework used by Bakkes and Bosch (2008). However, Stehfest et al*.* (2009) used the projections of agricultural production from Bruinsma (2003) and FAO (2006), which gave slightly different results. Total agricultural land use was projected to increase slightly (~10 Mha) in North America and Europe (incl. Ukraine and Russia) until 2030 and then decline. Only modest changes were projected for Oceania whereas the agricultural area in Asia is projected to peak in 2025 and then decrease significantly. In Asia and Africa, agricultural land use is projected to increase continuously up to 2050 (by ~60 Mha in total compared to 2010).

All of the studies and scenarios mentioned above predict a continued increase in either cropland or total agricultural land use in the developing world as a whole up to 2050 (incl. scenarios without biofuels). The projected increase varies from around 61 (Fischer et al. 2002, B1 scenario) to 600 Mha agricultural land (Alder et al. 2005, OS scenario) from 2010 to 2050. Projections of cropland alone vary from ~100 Mha (Bruinsma 2009) to ~390 Mha (Fischer 2009, TAR-V1 scenario). With one exception (Bakkes and Bosch 2008), all studies with a regional disaggregation of the developed world also predict a continued increase in either cropland or total agricultural land use in Africa and Latin America. That is also the case for Asia, except that Bakkes and Bosch (2008) and Stehfest et al*.* (2009) foresee a decline in Asian agricultural land use from around 2025-30.

For the developed world, the studies mentioned above differ in land use trends (declining, decreasing, fluctuating, or steady) but agree that land use changes are much smaller than in the developing world. All investigated studies agree that global agricultural land use will increase steadily up to 2030. Five of the studies agree that this increase will continue until 2050. Stehfest et al*.* (2009) project a decrease in global agricultural land use from around 2030, both when looking at food and feed only but also when including abandoned land and grassland for biofuels production. Finally, Bakkes and Bosch (2008) also project a decrease in the global agricultural area from around 2030 when looking at food and feed only. When all drivers are included (incl. biofuels), Stehfest et al*.* (2009) are the only authors to predict a decrease in total agricultural land use before 2050.

As mentioned in the main paper, none of the studies include future production of biomaterials, which is projected to increase significantly in the future (King et al. 2010).

References

Alder J et al. (2005) Changes in Ecosystem Services and Their Drivers across the Scenarios, in: Ecosystems and Human Well-being: Scenarios, Volume 2, Carpenter SR, Pingali PL, Bennett EM, Zurek MB, Eds., Island Press, Washington·Covelo·London, pp. 297-373.

Bakkes JA and Bosch PR, Eds. (2008) Background report to the OECD environmental outlook to 2030. Overviews, details, and methodology of model-based analysis, MNP Report 500113001, www.pbl.nl/en/publications/2008/BackgroundreporttotheOECDEnvironmentalOutlookto2030.html

Bruinsma J (2009) The Resource Outlook to 2050, paper presented at FAO Expert meeting on How to Feed the World in 2050, Rome, 24-26 June 2009.

Bruinsma J, Ed. (2003) *World Agriculture: towards 2015/2030. An FAO Perspective* (Earthscan, London).

FAO (2006) World agriculture: towards 2030/2050. Prospects for food, nutrition, agriculture and major commodity groups, Food and Agriculture Organisation of the United Nations, Rome.

FAOSTAT (2010) United Nations Food and Agricultural Organisation, [http://faostat.fao.org](http://faostat.fao.org/).

Fischer G (2009) World Food and Agriculture to 2030/50,paper presented at FAO Expert meeting on How to Feed the World in 2050, Rome, 24-26 June 2009.

Fischer G, Shah M, van Velthuizen H (2002) *Climate Change and Agricultural Vulnerability*, Rema*print*, Vienna.

Gorte RW (2007) Carbon sequestration in forests, Order Code RL31432, Congressional Research Service, available at www.nationalaglawcenter.org/assets/crs/RL31432.pdf

Hertel TW et al. (2010) Global land use and greenhouse gas emissions impacts of U.S. maize ethanol: Estimating market-mediated responses. *Bioscience* **60**, 223-231.

IEA (2006) World Energy Outlook 2006, International Energy Agency, Paris.

IEA (2008) World Energy Outlook 2008, International Energy Agency, Paris.

King DA, Inderwildi OR, Williams A, Hagan A, Eds. (2010) The Future of Industrial Biorefineries, World Economic Forum, Cologny/Geneva.

Kløverpris JH, Baltzer K, Nielsen PH (2010) Life cycle inventory modelling of land use induced by crop consumption. Part 2: Example of wheat consumption in Brazil, China, Denmark and the USA. *Int. J. LCA* **15**, 90-103

Lal R (2010), Soil Carbon Sequestration Impacts on Global Climate Change and Food Security. Science **304**, 1623-1627.

McLauchlan K (2006) The Nature and Longevity of Agricultural Impacts on Soil Carbon and Nutrients: A Review. Ecosystems **9**, 1364-1382.

P. Forster et al*.*, in *Climate Change 2007: The Physical Science Basis. Contribution of Working Group I to the Fourth Assessment Report of the Intergovernmental Panel on Climate Change* (Cambridge Univ. Press, Cambridge, UK and New York, NY, 2007), pp. 129-234.

Righelato R and Spracklen DV (2007): Carbon Mitigation by Biofuels or by Saving and Restoring Forests?, *Science* **317**, 902

Roques S, Garstang J, Kindred D, Sylvester-Bradley R, Wiltshire J (2011) Idle cropland for future crop production, World Agriculture 2(2):40-42

Smith P et al. (2010) Competition for Land, Philos T Roy Soc B 365:294-2957

Stehfest E et al. (2009) Climate benefits of changing diet. Clim. Change **95**, 83-102

T. Searchinger et al*.*, Use of U.S. Croplands for Biofuels Increases Greenhouse Gases Through Emissions from Land Use Change, *Science* **319**, 1238-1240.

UN Population Division (2009): World Population Prospects: The 2008 Revision, http://esa.un.org/UNPP.

van Meijl H, van Rheenen T, Tabeau A, Eickhout B (2006) The impact of different policy environments on agricultural land use in Europe. *Agric., Ecosyst. Environ.* **114**, 21-38.

Watson RT et al*.*, Eds. (2000) *IPCC Special Report on Land Use, Land-Use Change And Forestry*, Cambridge Univ. Press, UK

**Appendix A**

Land use changes modeled by Hertel et al*.* (2010)

Unit: 1000 ha

| Region | Subregions | New cropland | Forest cleared | Pasture cleared | Forest reversion |
| --- | --- | --- | --- | --- | --- |
| Africa | MEASTNAEX | 70.5 | 0.0 | -72.0 | 1.5 |
|  | SSAEX | 490.5 | -46.4 | -482.1 | 38.0 |
|  | RoAFR | 82.7 | -3.7 | -79.1 | 0.1 |
|  | Total | 643.7 | -50.1 | -633.2 | 39.6 |
| Latin America | BRAZIL | 278.9 | -58.9 | -220.0 | 0.0 |
|  | LAEEX | 161.3 | -13.6 | -163.8 | 16.1 |
|  | RoLAC | 54.8 | 0.0 | -129.2 | 74.5 |
|  | Total | 494.9 | -72.5 | -513.0 | 90.6 |
| Asia | CHIHKG | 33.8 | 0.0 | -118.8 | 84.9 |
|  | INDIA | 42.4 | -26.2 | -16.2 | 0.0 |
|  | SASIAEEX | -12.2 | 0.0 | -12.5 | 24.7 |
|  | RoHIA | 0.2 | 0.0 | -0.2 | 0.0 |
|  | JAPAN | 8.3 | -6.8 | -1.4 | 0.0 |
|  | RoASIA | 23.5 | -7.3 | -18.2 | 2.0 |
|  | Total | 96.0 | -40.4 | -167.3 | 111.6 |
| Total, developing |  | 1,234.6 | -163.0 | -1,313.6 | 241.8 |
| Canada | CAN | 408.1 | -268.6 | -139.4 | 0.0 |
| Europe | EU27 | 415.1 | -269.1 | -145.9 | 0.0 |
|  | EEFSUEX | 149.0 | 0.0 | -399.3 | 250.3 |
|  | RoE | 67.9 | -20.0 | -49.7 | 1.8 |
|  | Total | 632.0 | -289.1 | -595.0 | 252.1 |
| United States | USA | 1,458.0 | -566.6 | -964.6 | 73.2 |
| Oceania | Oceania | 102.2 | -1.3 | -102.8 | 1.9 |
| Total, developed |  | 2,600.2 | -1,125.5 | -1,801.8 | 327.2 |
| Total, global |  | 3,834.8 | -1,288.5 | -3,115.4 | 569.0 |

**Appendix B**

Land use emissions data applied by Hertel et al*.* (2010)

Unit: t CO2e/ha

|  |  | Cropland | Forestland Area converted to crops | | | Pasture Converted to Crops or Forestry | | | Forest Gained (from pasture) | | |
| --- | --- | --- | --- | --- | --- | --- | --- | --- | --- | --- | --- |
| Region | Subregions | Above | Above | Below | Lost Seq.* | Above | Below | Lost Seq.* | Above | Below | Seq.* |
| Africa | MEASTNAEX | -18.3 | -89.1 | -63.3 | 0.0 | -37.4 | -45.0 | 0.0 | 0.0 | -58.7 | 0.0 |
|  | SSAEX | -18.3 | -197.6 | -101.2 | -0.2 | -15.0 | -27.5 | 0.0 | 0.0 | -82.8 | -1.6 |
|  | RoAFR | -18.3 | -197.6 | -101.2 | -0.2 | -15.0 | -27.5 | 0.0 | 0.0 | -82.8 | -1.6 |
| Latin America | BRAZIL | -18.3 | -299.4 | -75.1 | -0.5 | -32.7 | -38.8 | 0.0 | 0.0 | -66.0 | -3.3 |
|  | LAEEX | -18.3 | -299.4 | -75.1 | -0.5 | -32.7 | -38.8 | 0.0 | 0.0 | -66.0 | -3.3 |
|  | RoLAC | -18.3 | -299.4 | -75.1 | -0.5 | -32.7 | -38.8 | 0.0 | 0.0 | -66.0 | -3.3 |
| Asia | CHIHKG | -18.3 | -432.8 | -93.5 | -1.6 | -23.1 | -173.3 | 0.0 | 0.0 | -83.2 | -4.7 |
|  | INDIA | -18.3 | -432.8 | -93.5 | -1.6 | -23.1 | -173.3 | 0.0 | 0.0 | -83.2 | -4.7 |
|  | SASIAEEX | -18.3 | -729.2 | -99.6 | -3.6 | -33.0 | -52.5 | 0.0 | 0.0 | -87.8 | -8.3 |
|  | RoHIA | -18.3 | -432.8 | -93.5 | -1.6 | -33.0 | -52.5 | 0.0 | 0.0 | -83.2 | -4.7 |
|  | JAPAN | -18.3 | -432.8 | -93.5 | -1.6 | -33.0 | -52.5 | 0.0 | 0.0 | -83.2 | -4.7 |
|  | RoASIA | -18.3 | -729.2 | -99.6 | -3.6 | -33.0 | -52.5 | 0.0 | 0.0 | -87.8 | -8.3 |
| Canada | CAN | -18.3 | -528.0 | -122.8 | -1.8 | -23.1 | -173.3 | 0.0 | 0.0 | -173.3 | -8.7 |
| Europe | EU27 | -18.3 | 0.0 | -108.6 | -6.3 | 0.0 | -129.9 | -0.9 | 0.0 | -173.3 | -6.3 |
|  | EEFSUEX | -18.3 | 0.0 | -92.1 | -7.3 | 0.0 | -129.9 | -0.9 | 0.0 | -173.3 | -7.3 |
|  | RoE | -18.3 | 0.0 | -108.6 | -6.3 | 0.0 | -129.9 | -0.9 | 0.0 | -173.3 | -6.3 |
| United States | USA | -18.3 | -564.2 | -146.3 | -1.6 | -33.0 | -73.3 | 0.0 | 0.0 | -128.0 | -3.0 |
| Oceania | Oceania | -18.3 | -304.5 | -79.8 | -0.1 | -59.4 | -38.5 | 0.0 | 0.0 | -69.5 | -4.3 |
| * Annual |  |  |  |  |  |  |  |  |  |  |  |

1. Fluctuations in Australia may be explained by droughts and other none-market factors. [↑](#footnote-ref-2)
2. In the original study by Searchinger et al. (2008), no data were available on vegetation and soil carbon and carbon uptake (the last two columns in Table 1) for the region RoW (Rest of the World). We estimated these numbers based on area change and total emissions for RoW. On average, ‘vegetation C +25% soil C’ made up 89% of the carbon per hectare (the sum of the two last columns in Table 1). This was assumed also to be the case for RoW. For this region we thereby get: ‘Vegetation C +25% soil C’ = 73 · 106 t CO2e · 89% · / (3.67 CO2/C · 208 103 ha) = 85.1 t C/ha. The same approach was applied for ’30 years of uptake existing forest’ but with the value 11% (last column in Table 1). [↑](#footnote-ref-3)
3. (2.86 GT CO2e + 0.937 GT CO2e) · 1015 g/GT / (1.22 · 109 GJ/y · 103 MJ/GJ · 30 y) = 104 g CO2e/MJ [↑](#footnote-ref-4)
4. Another approach, which allows for a more flexible land supply in the GTAP Model has also been suggested, see van Meijl et al. (2006) and Kløverpris et al. (2010). [↑](#footnote-ref-5)
5. However, a dynamic GTAP Model should be underway. [↑](#footnote-ref-6)
6. The number deviates slightly from the number in Table 4 (1.3 Mha new cropland in the developed world) because Hertel *et al.* (2010) counts Ocenania under Asia whereas we include Oceania in the developed world. [↑](#footnote-ref-7)
